# Supplementary material for: The UCL low-density lipoprotein receptor gene variant database: pathogenicity update
Source: PubMed Central journal article supplement — J Med Genet. 2016 Nov 7;54(4):217–23. doi: 10.1136/jmedgenet-2016-104054 (PMC5502305; doi:10.1136/jmedgenet-2016-104054), 2016-11-07
Supplement: jmedgenet-2016-104054supp001.pdf [file jmedgenet-2016-104054supp001.pdf]

## Supplementary table 1

### Accession numbers of peptide sequences used to generate LDLR refined SIFT analysis

| UniProt Accession Number | Species                        | Common name                |
|--------------------------|--------------------------------|----------------------------|
| P01130                   | <i>Homo sapiens</i>            | Human                      |
| P35951                   | <i>Mus musculus</i>            | Mouse                      |
| P35952                   | <i>Rattus norvegicus</i>       | Rat                        |
| H9YWX0                   | <i>Macaca mulatta</i>          | Rhesus macaque             |
| F7IJZ1                   | <i>Callithrix jacchus</i>      | White-tufted-ear marmoset  |
| G3S2W0                   | <i>Gorilla gorilla</i>         | Western lowland gorilla    |
| H2QFC9                   | <i>Pan troglodytes</i>         | Common chimpanzee          |
| H2NXL0                   | <i>Pongo abelii</i>            | Sumatran orangutan         |
| Q99087                   | <i>Xenopus laevis</i>          | African clawed frog        |
| G3W664                   | <i>Sarcophilus harrisii</i>    | Tasmanian devil            |
| F7CG52                   | <i>Equus caballus</i>          | Horse                      |
| F7BQZ9                   | <i>Monodelphis domestica</i>   | Grey short-tailed opossum  |
| Q7T2X3                   | <i>Gallus gallus</i>           | Red Jungle fowl chicken    |
| F1MZ58                   | <i>Bos taurus</i>              | Cow                        |
| Q28832                   | <i>Sus scrofa</i>              | Pig                        |
| F1PML2                   | <i>Canis familiaris</i>        | Dog                        |
| P20063                   | <i>Oryctolagus cuniculus</i>   | Rabbit                     |
| P35950                   | <i>Cricetulus griseus</i>      | Chinese hamster            |
| P79708                   | <i>Chiloscyllium plagiosum</i> | White spotted bamboo shark |
| Q7ZZT0                   | <i>Danio rerio</i>             | Zebrafish                  |

### Table S1

The UniprotKB accession numbers for the amino acid sequences used in the Refined SIFT analysis.
